# Supplementary material
Source: Springer Nature journal article supplement (https://www.springermedizin.de/resource/supplementary/12876_2010_548_MOESM1_ESM.pdf/9437198)

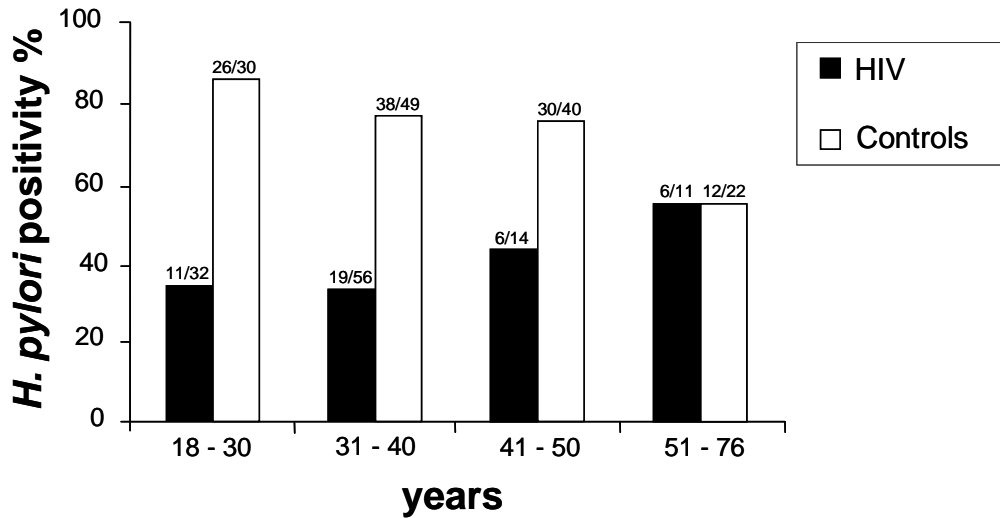

Supplement: MOESM1 [file 9437198]
